# Supplementary material
Source: PubMed Central journal article supplement (PMC5587354)

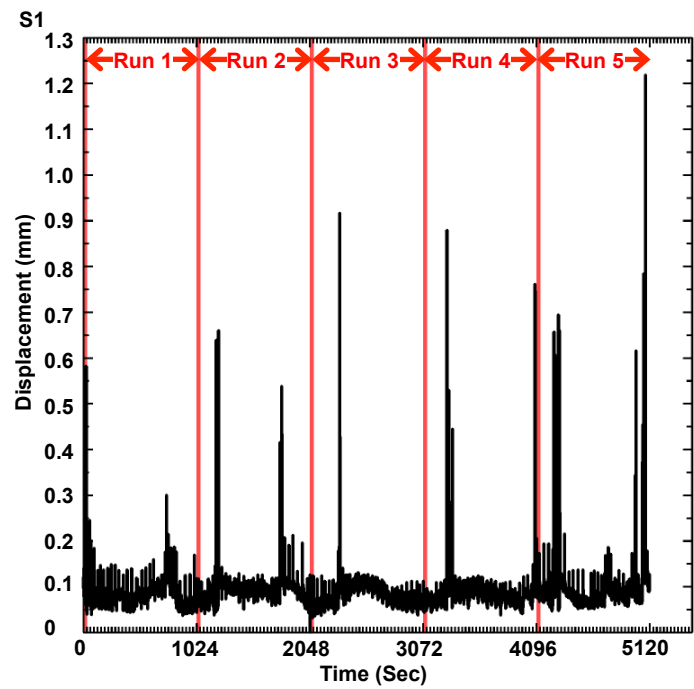

Supplement: NIHMS861535-supplement.pdf [file NIHMS861535-supplement.pdf]
